# Supplementary material for: Modulating the carrier transport of PtAg2 heteronuclear complexes to attain highly efficient OLEDs with narrow-band emission
Source: Royal Society of Chemistry journal article supplement (doi:10.1039/d1tc00678a), 2021-01-01
Supplement: d1tc00678a1.pdf [file d1tc00678a1.pdf]

# Electronic Supplementary Information (ESI)

## Modulating carrier transport of Pt-Ag heteronuclear complexes to attain highly efficient OLEDs with narrow-band emission

Zhao-Yi Wang,<sup>acde</sup> Lin-Xi Shi,<sup>ab</sup> Liang-Jin Xu,<sup>\*a</sup> Li-Yi Zhang,<sup>a</sup> Jin-Yun Wang,<sup>a</sup> and  
Zhong-Ning Chen<sup>\*ab</sup>

<sup>a</sup> State Key Laboratory of Structural Chemistry, Fujian Institute of Research on the Structure of Matter, Chinese Academy of Sciences, Fuzhou, Fujian 350002, China.

<sup>b</sup> Fujian Science & Technology Innovation Laboratory for Optoelectron Information of China, Fuzhou, Fujian 350108, China.

<sup>c</sup> ShanghaiTech University, 393 Middle Huaxia Road, Pudong, Shanghai 201210, China.

<sup>d</sup> Shanghai Advanced Research Institute, Chinese Academy of Sciences, 99 Haike Road, Pudong, Shanghai 201210, China.

<sup>e</sup> University of Chinese Academy of Sciences, Beijing 100039, China.

E-mail: xuliangjin@fjirsm.ac.cn; czn@fjirsm.ac.cn

**Table S1.** Crystallographic Data of the PtAg<sub>2</sub> Complexes 1-5.

|                                                  | 1·4CH <sub>2</sub> Cl <sub>2</sub>                                                                     | 2·4CH <sub>2</sub> Cl <sub>2</sub>                                                                                                                | 3·4CH <sub>2</sub> Cl <sub>2</sub>                                                                                   | 4·3CHCl <sub>3</sub>                                                                                               | 5·6CH <sub>2</sub> Cl <sub>2</sub>                                                                                                                 |
|--------------------------------------------------|--------------------------------------------------------------------------------------------------------|---------------------------------------------------------------------------------------------------------------------------------------------------|----------------------------------------------------------------------------------------------------------------------|--------------------------------------------------------------------------------------------------------------------|----------------------------------------------------------------------------------------------------------------------------------------------------|
| Empirical Formula                                | C <sub>96</sub> H <sub>100</sub> Ag <sub>2</sub><br>C <sub>110</sub> O <sub>12</sub> P <sub>6</sub> Pt | C <sub>120</sub> H <sub>114</sub> Ag <sub>2</sub> Cl <sub>8</sub><br>F <sub>6</sub> N <sub>2</sub> O <sub>6</sub> P <sub>6</sub> PtS <sub>2</sub> | C <sub>104</sub> H <sub>96</sub> O <sub>12</sub> P <sub>6</sub><br>C <sub>110</sub> Ag <sub>2</sub> PtS <sub>2</sub> | C <sub>107</sub> H <sub>97</sub> Ag <sub>2</sub><br>Cl <sub>11</sub> N <sub>4</sub> O <sub>11</sub> P <sub>6</sub> | C <sub>126</sub> H <sub>114</sub> N <sub>6</sub> P <sub>6</sub> C <sub>112</sub><br>Ag <sub>2</sub> PtO <sub>6</sub> S <sub>2</sub> F <sub>6</sub> |
| Formula Weight                                   | 2396.90                                                                                                | 2738.50                                                                                                                                           | 2553.07                                                                                                              | 2599.46                                                                                                            | 3008.40                                                                                                                                            |
| Crystal System                                   | Triclinic                                                                                              | Triclinic                                                                                                                                         | Triclinic                                                                                                            | Triclinic                                                                                                          | Triclinic                                                                                                                                          |
| Space Group                                      | <i>P-1</i>                                                                                             | <i>P-1</i>                                                                                                                                        | <i>P-1</i>                                                                                                           | <i>P-1</i>                                                                                                         | <i>P-1</i>                                                                                                                                         |
| a (Å)                                            | 12.9220(9)                                                                                             | 14.3798(12)                                                                                                                                       | 14.2447(10)                                                                                                          | 15.2948(17)                                                                                                        | 14.2767(10)                                                                                                                                        |
| b (Å)                                            | 15.4161(10)                                                                                            | 15.1217(13)                                                                                                                                       | 14.3052(11)                                                                                                          | 18.341(2)                                                                                                          | 14.9810(11)                                                                                                                                        |
| c (Å)                                            | 15.5171(11)                                                                                            | 15.9141(15)                                                                                                                                       | 14.6279(11)                                                                                                          | 22.261(3)                                                                                                          | 15.3107(10)                                                                                                                                        |
| α (deg)                                          | 114.362(2)                                                                                             | 111.210(3)                                                                                                                                        | 107.774(3)                                                                                                           | 72.206(4)                                                                                                          | 86.910(3)                                                                                                                                          |
| β (deg)                                          | 92.751(3)                                                                                              | 95.400(3)                                                                                                                                         | 109.179(2)                                                                                                           | 73.763(4)                                                                                                          | 84.744(2)                                                                                                                                          |
| γ (deg)                                          | 113.221(2)                                                                                             | 110.171(3)                                                                                                                                        | 91.196(2)                                                                                                            | 72.834(4)                                                                                                          | 74.999(3)                                                                                                                                          |
| V (Å <sup>3</sup> )                              | 2504.5(3)                                                                                              | 2932.0(5)                                                                                                                                         | 2656.5(3)                                                                                                            | 5556.7(11)                                                                                                         | 3148.2(4)                                                                                                                                          |
| Z                                                | 1                                                                                                      | 1                                                                                                                                                 | 1                                                                                                                    | 2                                                                                                                  | 1                                                                                                                                                  |
| ρ <sub>calcd</sub> (g cm <sup>-3</sup> )         | 1.589                                                                                                  | 1.551                                                                                                                                             | 1.596                                                                                                                | 1.554                                                                                                              | 1.587                                                                                                                                              |
| μ (mm <sup>-1</sup> )                            | 2.201                                                                                                  | 1.885                                                                                                                                             | 2.118                                                                                                                | 2.014                                                                                                              | 1.846                                                                                                                                              |
| Radiation (λ, Å)                                 | 0.71073                                                                                                | 0.71073                                                                                                                                           | 0.71073                                                                                                              | 0.71073                                                                                                            | 0.71073                                                                                                                                            |
| Temperature (K)                                  | 100.0                                                                                                  | 100.0                                                                                                                                             | 179.68                                                                                                               | 149.99                                                                                                             | 100.04                                                                                                                                             |
| GOF                                              | 1.051                                                                                                  | 1.071                                                                                                                                             | 1.081                                                                                                                | 1.051                                                                                                              | 1.035                                                                                                                                              |
| R1 (F <sub>o</sub> ) <sup>a)</sup>               | 0.0527                                                                                                 | 0.0282                                                                                                                                            | 0.0360                                                                                                               | 0.0582                                                                                                             | 0.0293                                                                                                                                             |
| wR2 (F <sub>o</sub> <sup>2</sup> ) <sup>b)</sup> | 0.1366                                                                                                 | 0.0705                                                                                                                                            | 0.0952                                                                                                               | 0.1453                                                                                                             | 0.0705                                                                                                                                             |

$$^a) R1 = \sum |F_o - F_c| / \sum F_o, \quad ^b) wR2 = \sum [w(F_o^2 - F_c^2)^2] / \sum [w(F_o^2)]^{1/2}$$

**Table S2.** The Optimization Procedures of the Devices Based on PtAg<sub>2</sub> Complex 4 by Modifying Doping Percentage and Host Materials. <sup>a)</sup>

| Doping Percentage | Host Materials (ratio) | Lmax (cd m <sup>-2</sup> ) | Von (V) | CEmax (cd A <sup>-1</sup> ) | PEmax (lm W <sup>-1</sup> ) | EQEmax (%) |
|-------------------|------------------------|----------------------------|---------|-----------------------------|-----------------------------|------------|
| 6%                | TCTA : OXD-7 (1 : 1)   | 4182                       | 3.2     | 35.2                        | 32.4                        | 9.2        |
| 6%                | TAPC : OXD-7 (1 : 1)   | 1939                       | 2.8     | 25.5                        | 27.2                        | 6.7        |
| 6%                | mCP : OXD-7 (1 : 1)    | 11912                      | 4.1     | 69.5                        | 50.5                        | 18.2       |
| 3%                | mCP : OXD-7 (1 : 1)    | 10515                      | 4.2     | 53.1                        | 30.3                        | 13.9       |
| 9%                | mCP : OXD-7 (1 : 1)    | 11360                      | 4.4     | 57.8                        | 34.5                        | 15.1       |
| 6%                | mCP : OXD-7 (2 : 1)    | 9834                       | 4.0     | 64.3                        | 41.2                        | 16.8       |
| 6%                | mCP : OXD-7 (1 : 2)    | 9318                       | 4.7     | 51.5                        | 28.4                        | 13.5       |

<sup>a)</sup> Device structure: ITO / PEDOT : PSS (40 nm) / Poly-TPD (50 nm) / host materials : PtAg<sub>2</sub> (50 nm) / BmPyPb (50 nm) / LiF (1 nm) / Al (100 nm).

**Table S3.** The Partial Molecular Orbital Compositions (%) by SCPA Approach in the Ground State and the Absorption Transition for Complex **1** in the CH<sub>2</sub>Cl<sub>2</sub> Solution Calculated by TD-DFT Method at the PBE1PBE Level.

| Orbital | Energy (eV) | MO Contribution (%) |                  |       |       |
|---------|-------------|---------------------|------------------|-------|-------|
|         |             | Pt (s/p/d)          | Ag (s/p/d)       | PPP   | CCR   |
| L+11    | -0.95       | 3.53 (0/100/0)      | 10.98 (23/69/8)  | 72.01 | 13.47 |
| LUMO    | -2.42       | 16.98 (0/100/0)     | 20.52 (75/16/9)  | 51.75 | 10.75 |
| HOMO    | -5.89       | 16.36 (1/0/99)      | 1.13 (39/28/33)  | 3.12  | 79.39 |
| H-2     | -6.68       | 27.57 (35/0/65)     | 35.42 (36/12/51) | 36.43 | 0.57  |

| States | E, nm (eV) | O.S.   | Transition (Contrib.) | Assignment                                            | Exp. (nm) |
|--------|------------|--------|-----------------------|-------------------------------------------------------|-----------|
| S1     | 448 (2.77) | 0.4388 | HOMO→LUMO (98%)       | <sup>1</sup> LLCT/ <sup>1</sup> LMCT/ <sup>1</sup> MC | 437       |
| S3     | 362 (3.43) | 0.5945 | H-2→LUMO (98%)        | <sup>1</sup> MC/ <sup>1</sup> IL/ <sup>1</sup> MLCT   |           |
| S25    | 283 (4.38) | 0.2004 | HOMO→L+11 (80%)       | <sup>1</sup> LLCT/ <sup>1</sup> MC/ <sup>1</sup> IL   |           |

**Table S4.** The Partial Molecular Orbital Compositions (%) by SCPA Approach in the Lowest-Energy Triplet State and the Emission Transition for Complex **1** in the CH<sub>2</sub>Cl<sub>2</sub> Solution Calculated by TD-DFT Method at the PBE1PBE Level.

| Orbital | Energy (eV) | MO Contribution (%) |                  |       |       |
|---------|-------------|---------------------|------------------|-------|-------|
|         |             | Pt (s/p/d)          | Ag (s/p/d)       | PPP   | CCR   |
| LUMO    | -2.62       | 21.10 (0/100/0)     | 21.73 (80/10/10) | 46.32 | 10.86 |
| HOMO    | -5.70       | 16.84 (1/0/99)      | 1.01 (42/35/23)  | 2.78  | 79.37 |
| H-1     | -6.22       | 1.41 (0/100/0)      | 8.42 (46/10/44)  | 11.83 | 78.35 |
| H-2     | -6.75       | 27.00 (43/0/57)     | 35.64 (36/13/50) | 36.75 | 0.61  |

| States | E, nm (eV) | O.S.   | Transition (Contrib.) | Assignment                                                             | Exp. (nm) |
|--------|------------|--------|-----------------------|------------------------------------------------------------------------|-----------|
| T1     | 618 (2.00) | 0.0000 | HOMO→LUMO (90%)       | <sup>3</sup> LLCT/ <sup>3</sup> LMCT/ <sup>3</sup> MC/ <sup>3</sup> IL | 563       |
| T2     | 488 (2.54) | 0.0000 | H-1→LUMO (72%)        | <sup>3</sup> LLCT/ <sup>3</sup> LMCT/ <sup>3</sup> IL                  |           |
| T3     | 416 (2.98) | 0.0000 | H-2→LUMO (94%)        | <sup>3</sup> MC/ <sup>3</sup> IL/ <sup>3</sup> MLCT                    |           |

**Table S5.** The Partial Molecular Orbital Compositions (%) by SCPA Approach in the Ground State and the Absorption Transition for Complex **2** in the CH<sub>2</sub>Cl<sub>2</sub> Solution Calculated by TD-DFT Method at the PBE1PBE Level.

| Orbital | Energy (eV) | MO Contribution (%) |                  |       |       |
|---------|-------------|---------------------|------------------|-------|-------|
|         |             | Pt (s/p/d)          | Ag (s/p/d)       | PPP   | CCR   |
| L+24    | -0.55       | 21.93 (98/0/2)      | 15.55 (89/8/3)   | 27.93 | 34.60 |
| L+23    | -0.57       | 3.15 (0/100/0)      | 16.40 (87/11/3)  | 17.67 | 62.78 |
| L+22    | -0.57       | 26.93 (95/0/5)      | 29.42 (90/8/2)   | 19.72 | 23.93 |
| L+8     | -1.16       | 13.17 (0/100/0)     | 9.34 (86/10/4)   | 23.34 | 54.15 |
| L+2     | -1.50       | 15.55 (0/100/0)     | 11.39 (66/16/18) | 69.52 | 3.53  |
| L+1     | -1.51       | 15.72 (25/0/75)     | 4.96 (40/42/18)  | 77.85 | 1.48  |
| LUMO    | -2.34       | 17.51 (0/100/0)     | 9.37 (28/49/23)  | 62.19 | 10.94 |
| HOMO    | -5.53       | 5.22 (20/0/80)      | 1.15 (59/27/13)  | 1.32  | 92.31 |
| H-1     | -5.63       | 0.11 (0/100/0)      | 0.65 (23/19/58)  | 3.75  | 95.50 |
| H-4     | -7.03       | 38.14 (12/0/88)     | 10.55 (13/17/69) | 10.37 | 40.94 |

| States | E, nm (eV) | O.S.   | Transition (Contrib.) | Assignment                                                             | Exp. (nm) |
|--------|------------|--------|-----------------------|------------------------------------------------------------------------|-----------|
| S1     | 482 (2.57) | 0.0853 | HOMO→LUMO (96%)       | <sup>1</sup> LLCT/ <sup>1</sup> LMCT/ <sup>1</sup> IL                  | 468       |
| S4     | 353 (3.51) | 0.5106 | HOMO→L+2 (81%)        | <sup>1</sup> LLCT/ <sup>1</sup> LMCT                                   |           |
| S9     | 338 (3.67) | 1.0933 | H-1→L+1 (31%)         | <sup>1</sup> LLCT/ <sup>1</sup> LMCT                                   |           |
|        |            |        | HOMO→L+8 (27%)        | <sup>1</sup> IL/ <sup>1</sup> LLCT/ <sup>1</sup> LMCT                  |           |
|        |            |        | H-4→LUMO (13%)        | <sup>1</sup> LLCT/ <sup>1</sup> MC/ <sup>1</sup> MLCT/ <sup>1</sup> IL |           |
| S33    | 300 (4.14) | 0.2968 | HOMO→L+23 (42%)       | <sup>1</sup> IL/ <sup>1</sup> LLCT/ <sup>1</sup> LMCT                  |           |
|        |            |        | H-1→L+22 (21%)        | <sup>1</sup> LMCT/ <sup>1</sup> IL/ <sup>1</sup> LLCT                  |           |
|        |            |        | H-1→L+24 (14%)        | <sup>1</sup> LMCT/ <sup>1</sup> IL/ <sup>1</sup> LLCT                  |           |

**Table S6.** The Partial Molecular Orbital Compositions (%) by SCPA Approach in the Lowest-Energy Triplet State and the Emission Transition for Complex **2** in the CH<sub>2</sub>Cl<sub>2</sub> Solution Calculated by TD-DFT Method at the PBE1PBE Level.

| Orbital | Energy (eV) | MO Contribution (%) |                  |       |       |
|---------|-------------|---------------------|------------------|-------|-------|
|         |             | Pt (s/p/d)          | Ag (s/p/d)       | PPP   | CCR   |
| L+11    | -1.07       | 11.40 (46/0/54)     | 10.52 (55/30/14) | 22.93 | 55.14 |
| L+8     | -1.26       | 4.70 (0/100/0)      | 2.08 (42/51/7)   | 29.40 | 63.82 |
| LUMO    | -2.75       | 21.46 (0/100/0)     | 24.98 (80/8/12)  | 47.13 | 6.43  |
| HOMO    | -5.45       | 4.84 (23/0/77)      | 1.54 (67/20/13)  | 1.91  | 91.70 |
| H-1     | -5.56       | 0.71 (0/100/0)      | 1.57 (83/8/9)    | 3.57  | 94.16 |

| States | E, nm (eV) | O.S.   | Transition (Contrib.) | Assignment                                            | Exp. (nm) |
|--------|------------|--------|-----------------------|-------------------------------------------------------|-----------|
| T1     | 605 (2.05) | 0.0000 | HOMO→LUMO (92%)       | <sup>3</sup> LLCT/ <sup>3</sup> LMCT                  | 636       |
| T2     | 558 (2.22) | 0.0000 | H-1→LUMO (91%)        | <sup>3</sup> LLCT/ <sup>3</sup> LMCT                  |           |
| T3     | 485 (2.56) | 0.0000 | HOMO→L+8 (42%)        | <sup>3</sup> IL/ <sup>3</sup> LLCT                    |           |
|        |            |        | H-1→L+11 (25%)        | <sup>3</sup> IL/ <sup>3</sup> LLCT/ <sup>3</sup> LMCT |           |

**Table S7.** The Partial Molecular Orbital Compositions (%) by SCPA Approach in the Ground State and the Absorption Transition for Complex **3** in the CH<sub>2</sub>Cl<sub>2</sub> Solution Calculated by TD-DFT Method at the PBE1PBE Level.

| Orbital | Energy (eV) | MO Contribution (%) |                  |       |       |
|---------|-------------|---------------------|------------------|-------|-------|
|         |             | Pt (s/p/d)          | Ag (s/p/d)       | PPP   | CCR   |
| L+5     | -1.61       | 6.87 (0/100/0)      | 11.38 (28/62/11) | 45.24 | 36.51 |
| L+2     | -2.03       | 7.66 (0/100/0)      | 7.41 (55/37/8)   | 36.52 | 48.41 |
| L+1     | -2.26       | 19.35 (86/0/14)     | 16.97 (83/15/2)  | 4.53  | 59.15 |
| LUMO    | -2.79       | 13.44 (0/100/0)     | 13.02 (65/20/15) | 39.06 | 34.48 |
| HOMO    | -6.49       | 20.49 (20/0/80)     | 7.00 (57/10/34)  | 6.83  | 65.69 |
| H-1     | -6.84       | 1.63 (0/100/0)      | 17.03 (42/8/50)  | 20.51 | 60.84 |
| H-2     | -6.89       | 28.14 (36/0/64)     | 34.64 (39/12/49) | 35.38 | 1.85  |

| States | E, nm (eV) | O.S.   | Transition (Contrib.)           | Assignment                                                                                                                    | Exp. (nm) |
|--------|------------|--------|---------------------------------|-------------------------------------------------------------------------------------------------------------------------------|-----------|
| S1     | 416 (2.98) | 1.0329 | HOMO→LUMO (95%)                 | <sup>1</sup> IL/ <sup>1</sup> LLCT/ <sup>1</sup> MC                                                                           | 410       |
| S2     | 371 (3.35) | 0.5130 | H-2→LUMO (94%)                  | <sup>1</sup> IL/ <sup>1</sup> MLCT/ <sup>1</sup> MC                                                                           | 370       |
| S6     | 328 (3.78) | 0.3746 | HOMO→L+2 (77%)<br>H-1→L+1 (17%) | <sup>1</sup> IL/ <sup>1</sup> LLCT/ <sup>1</sup> MLCT/ <sup>1</sup> MC<br><sup>1</sup> IL/ <sup>1</sup> LMCT/ <sup>1</sup> MC | 319       |
| S14    | 299 (4.15) | 0.4101 | HOMO→L+5 (62%)                  | <sup>1</sup> IL/ <sup>1</sup> LLCT/ <sup>1</sup> MC/ <sup>1</sup> MLCT                                                        |           |

**Table S8.** The Partial Molecular Orbital Compositions (%) by SCPA Approach in the Lowest-Energy Triplet State and the Emission Transition for Complex **3** in the CH<sub>2</sub>Cl<sub>2</sub> Solution Calculated by TD-DFT Method at the PBE1PBE Level.

| Orbital | Energy (eV) | MO Contribution (%) |                  |       |       |
|---------|-------------|---------------------|------------------|-------|-------|
|         |             | Pt (s/p/d)          | Ag (s/p/d)       | PPP   | CCR   |
| L+2     | -2.07       | 9.28 (9/89/2)       | 7.78 (56/37/7)   | 36.39 | 46.55 |
| L+1     | -2.37       | 17.75 (77/9/15)     | 15.39 (80/17/3)  | 10.08 | 56.78 |
| LUMO    | -3.00       | 14.06 (4/95/1)      | 12.89 (68/16/16) | 32.99 | 40.06 |
| HOMO    | -6.27       | 18.54 (23/1/76)     | 5.94 (57/12/31)  | 5.16  | 70.36 |
| H-1     | -6.76       | 3.92 (12/38/50)     | 15.01 (42/8/49)  | 18.22 | 62.85 |

| States | E, nm (eV) | O.S.   | Transition (Contrib.)                                                | Assignment                                                                                                                                                                                                               | Exp. (nm) |
|--------|------------|--------|----------------------------------------------------------------------|--------------------------------------------------------------------------------------------------------------------------------------------------------------------------------------------------------------------------|-----------|
| T1     | 598 (2.07) | 0.0000 | HOMO→LUMO (70%)<br>HOMO→L+1 (13%)                                    | <sup>3</sup> IL/ <sup>3</sup> LLCT/ <sup>3</sup> MC<br><sup>3</sup> IL/ <sup>3</sup> MC/ <sup>3</sup> LMCT                                                                                                               | 534       |
| T2     | 533 (2.33) | 0.0000 | H-1→LUMO (31%)<br>HOMO→L+1 (22%)<br>H-1→L+1 (14%)                    | <sup>3</sup> IL/ <sup>3</sup> MC/ <sup>3</sup> LLCT<br><sup>3</sup> IL/ <sup>3</sup> MC/ <sup>3</sup> LMCT<br><sup>3</sup> IL/ <sup>3</sup> MC/ <sup>3</sup> LMCT                                                        |           |
| T3     | 435 (2.85) | 0.0000 | HOMO→L+2 (26%)<br>H-1→L+1 (14%)<br>HOMO→LUMO (13%)<br>HOMO→L+1 (12%) | <sup>3</sup> IL/ <sup>3</sup> LLCT/ <sup>3</sup> MC<br><sup>3</sup> IL/ <sup>3</sup> MC/ <sup>3</sup> LMCT<br><sup>3</sup> IL/ <sup>3</sup> LLCT/ <sup>3</sup> MC<br><sup>3</sup> IL/ <sup>3</sup> MC/ <sup>3</sup> LMCT |           |

**Table S9.** The Partial Molecular Orbital Compositions (%) by SCPA Approach in the Ground State and the Absorption Transition for Complex **4** in the CH<sub>2</sub>Cl<sub>2</sub> Solution Calculated by TD-DFT Method at the PBE1PBE Level.

| Orbital | Energy (eV) | MO Contribution (%) |                  |       |       |
|---------|-------------|---------------------|------------------|-------|-------|
|         |             | Pt (s/p/d)          | Ag (s/p/d)       | PPP   | CCR   |
| L+2     | -1.9        | 6.72 (0/100/0)      | 5.76 (38/55/7)   | 42.05 | 45.47 |
| L+1     | -2.13       | 32.60 (95/0/5)      | 22.48 (80/19/2)  | 3.60  | 41.32 |
| LUMO    | -2.77       | 13.00 (0/100/0)     | 11.60 (58/25/17) | 43.29 | 32.11 |
| HOMO    | -6.37       | 15.58 (12/0/88)     | 4.71 (44/12/44)  | 4.99  | 74.73 |
| H-1     | -6.65       | 0.70 (0/100/0)      | 10.21 (35/9/56)  | 12.63 | 76.46 |
| H-2     | -6.87       | 25.53 (35/0/65)     | 35.36 (40/11/49) | 36.84 | 2.28  |

| States | E, nm (eV) | O.S.   | Transition (Contrib.)           | Assignment                                                                                                 | Exp. (nm) |
|--------|------------|--------|---------------------------------|------------------------------------------------------------------------------------------------------------|-----------|
| S1     | 424 (2.92) | 1.3958 | HOMO→LUMO (94%)                 | <sup>1</sup> LLCT/ <sup>1</sup> IL/ <sup>1</sup> MC                                                        | 411       |
| S3     | 370 (3.35) | 0.5623 | H-2→LUMO (94%)                  | <sup>1</sup> IL/ <sup>1</sup> MLCT/ <sup>1</sup> MC                                                        | 370       |
| S6     | 325 (3.82) | 1.6354 | HOMO→L+2 (66%)<br>H-1→L+1 (25%) | <sup>1</sup> IL/ <sup>1</sup> LLCT/ <sup>1</sup> MC<br><sup>1</sup> LMCT/ <sup>1</sup> IL/ <sup>1</sup> MC | 317       |

**Table S10.** The Partial Molecular Orbital Compositions (%) by SCPA Approach in the Lowest-Energy Triplet State and the Emission Transition for Complex **4** in the CH<sub>2</sub>Cl<sub>2</sub> Solution Calculated by TD-DFT Method at the PBE1PBE Level.

| Orbital | Energy (eV) | MO Contribution (%) |                  |       |       |
|---------|-------------|---------------------|------------------|-------|-------|
|         |             | Pt (s/p/d)          | Ag (s/p/d)       | PPP   | CCR   |
| L+2     | -1.97       | 10.05 (31/67/2)     | 7.52 (50/43/7)   | 37.91 | 44.52 |
| L+1     | -2.28       | 29.38 (90/4/6)      | 20.28 (78/19/2)  | 8.46  | 41.88 |
| LUMO    | -2.96       | 14.37 (6/93/1)      | 12.08 (64/19/17) | 37.24 | 36.31 |
| HOMO    | -6.13       | 12.22 (14/1/85)     | 3.61 (44/13/43)  | 3.99  | 80.17 |
| H-1     | -6.58       | 3.35 (7/17/75)      | 8.21 (35/9/55)   | 10.53 | 77.91 |
| H-3     | -7.21       | 18.83 (35/3/62)     | 8.62 (43/16/42)  | 14.85 | 57.71 |

| States | E, nm (eV) | O.S.   | Transition (Contrib.)                                               | Assignment                                                                                                                                                                                                                                  | Exp. (nm) |
|--------|------------|--------|---------------------------------------------------------------------|---------------------------------------------------------------------------------------------------------------------------------------------------------------------------------------------------------------------------------------------|-----------|
| T1     | 601 (2.06) | 0.0000 | HOMO→LUMO (68%)<br>HOMO→L+1 (18%)                                   | <sup>3</sup> IL/ <sup>3</sup> LLCT/ <sup>3</sup> MC/ <sup>3</sup> LMCT<br><sup>3</sup> IL/ <sup>3</sup> LMCT/ <sup>3</sup> MC                                                                                                               | 522       |
| T2     | 537 (2.31) | 0.0000 | H-1→LUMO (38%)<br>HOMO→L+1 (18%)<br>H-1→L+1 (13%)<br>H-1→L+2 (10%)  | <sup>3</sup> IL/ <sup>3</sup> LLCT/ <sup>3</sup> LMCT/ <sup>3</sup> MC<br><sup>3</sup> IL/ <sup>3</sup> LMCT/ <sup>3</sup> MC<br><sup>3</sup> IL/ <sup>3</sup> LMCT/ <sup>3</sup> MC<br><sup>3</sup> IL/ <sup>3</sup> LLCT/ <sup>3</sup> MC |           |
| T3     | 459 (2.70) | 0.0000 | H-3→LUMO (15%)<br>HOMO→L+2 (14%)<br>H-1→L+1 (13%)<br>HOMO→L+1 (10%) | <sup>3</sup> IL/ <sup>3</sup> MC/ <sup>3</sup> LLCT<br><sup>3</sup> IL/ <sup>3</sup> LLCT/ <sup>3</sup> MC<br><sup>3</sup> IL/ <sup>3</sup> LMCT/ <sup>3</sup> MC<br><sup>3</sup> IL/ <sup>3</sup> LMCT/ <sup>3</sup> MC                    |           |

**Table S11.** The Partial Molecular Orbital Compositions (%) by SCPA Approach in the Ground State and the Absorption Transition for Complex **5** in the CH<sub>2</sub>Cl<sub>2</sub> Solution Calculated by TD-DFT Method at the PBE1PBE Level.

| Orbital | Energy (eV) | MO Contribution (%) |                  |       |       |
|---------|-------------|---------------------|------------------|-------|-------|
|         |             | Pt (s/p/d)          | Ag (s/p/d)       | PPP   | CCR   |
| L+4     | -2.03       | 8.03 (0/100/0)      | 5.22 (28/60/12)  | 43.37 | 43.38 |
| L+3     | -2.19       | 0.32 (9/88/3)       | 0.45 (87/9/4)    | 0.14  | 99.08 |
| L+2     | -2.19       | 0.29 (65/15/20)     | 0.32 (80/7/13)   | 0.20  | 99.19 |
| L+1     | -2.29       | 28.31 (94/0/6)      | 19.13 (80/19/2)  | 2.53  | 50.03 |
| LUMO    | -2.78       | 12.14 (0/100/0)     | 11.03 (60/23/16) | 39.00 | 37.83 |
| HOMO    | -6.47       | 21.13 (16/0/84)     | 7.70 (47/10/43)  | 8.32  | 62.84 |
| H-1     | -6.84       | 1.76 (0/100/0)      | 21.58 (38/7/55)  | 26.30 | 50.35 |
| H-2     | -6.86       | 28.54 (34/0/66)     | 34.34 (38/12/50) | 34.88 | 2.24  |
| H-4     | -7.38       | 0.12 (0/100/0)      | 0.09 (40/41/18)  | 2.04  | 97.75 |
| H-5     | -7.38       | 0.06 (43/0/56)      | 0.21 (75/15/10)  | 0.73  | 99.00 |
| H-8     | -7.44       | 0.35 (0/100/0)      | 2.15 (62/2/36)   | 4.02  | 93.49 |
| H-9     | -7.44       | 0.81 (22/0/78)      | 0.48 (15/53/32)  | 4.74  | 93.96 |
| H-17    | -7.61       | 0.97 (86/0/14)      | 0.82 (72/25/4)   | 1.30  | 96.92 |
| H-25    | -7.83       | 5.51 (48/0/52)      | 2.30 (24/7/69)   | 89.97 | 2.22  |

| States | E, nm (eV) | O.S.   | Transition (Contrib.)                                              | Assignment                                                                                                                                           | Exp. (nm) |
|--------|------------|--------|--------------------------------------------------------------------|------------------------------------------------------------------------------------------------------------------------------------------------------|-----------|
| S1     | 417 (2.97) | 1.2582 | HOMO→LUMO (95%)                                                    | <sup>1</sup> IL/ <sup>1</sup> LLCT/ <sup>1</sup> MC                                                                                                  | 412       |
| S2     | 371 (3.34) | 0.5637 | H-2→LUMO (93%)                                                     | <sup>1</sup> MLCT/ <sup>1</sup> IL/ <sup>1</sup> MC                                                                                                  | 371       |
| S8     | 325 (3.82) | 0.9648 | HOMO→L+4 (80%)<br>H-1→L+1 (13%)                                    | <sup>1</sup> IL/ <sup>1</sup> LLCT/ <sup>1</sup> MLCT/ <sup>1</sup> MC<br><sup>1</sup> IL/ <sup>1</sup> LMCT/ <sup>1</sup> MC                        | 330       |
| S55    | 278 (4.46) | 0.5505 | H-25→LUMO (20%)<br>H-8→L+2 (20%)<br>H-9→L+3 (19%)                  | <sup>1</sup> IL/ <sup>1</sup> LLCT/ <sup>1</sup> LMCT<br><sup>1</sup> IL<br><sup>1</sup> IL                                                          |           |
| S65    | 271 (4.57) | 0.5916 | H-4→L+1 (32%)<br>H-17→L+3 (14%)<br>H-5→LUMO (13%)<br>H-5→L+4 (11%) | <sup>1</sup> IL/ <sup>1</sup> LMCT<br><sup>1</sup> IL<br><sup>1</sup> LLCT/ <sup>1</sup> IL/ <sup>1</sup> LMCT<br><sup>1</sup> IL/ <sup>1</sup> LLCT | 269       |

**Table S12.** The Partial Molecular Orbital Compositions (%) by SCPA Approach in the Lowest-Energy Triplet State and the Emission Transition for Complex **5** in the CH<sub>2</sub>Cl<sub>2</sub> Solution Calculated by TD-DFT Method at the PBE1PBE Level.

| Orbital | Energy (eV) | MO Contribution (%) |                  |       |       |
|---------|-------------|---------------------|------------------|-------|-------|
|         |             | Pt (s/p/d)          | Ag (s/p/d)       | PPP   | CCR   |
| L+1     | -2.29       | 26.62 (93/0/7)      | 17.74 (80/19/1)  | 2.48  | 53.15 |
| LUMO    | -2.95       | 16.30 (0/100/0)     | 15.01 (71/13/15) | 39.34 | 29.35 |
| HOM     | -6.31       | 24.80 (23/0/77)     | 4.60 (63/9/28)   | 3.66  | 66.94 |
| O       |             |                     |                  |       |       |
| H-1     | -6.8        | 2.54 (0/100/0)      | 17.01 (38/7/55)  | 21.83 | 58.62 |
| H-2     | -6.9        | 26.31 (40/0/60)     | 35.76 (39/12/49) | 37.05 | 0.88  |

| States | <i>E</i> , nm (eV) | O.S.   | Transition (Contrib.)            | Assignment                                                                                                                    | Exp. (nm) |
|--------|--------------------|--------|----------------------------------|-------------------------------------------------------------------------------------------------------------------------------|-----------|
| T1     | 584 (2.12)         | 0.0000 | HOMO→LUMO (81%)                  | <sup>3</sup> LLCT/ <sup>β</sup> IL/ <sup>β</sup> MC                                                                           | 517       |
| T2     | 523 (2.37)         | 0.0000 | H-1→LUMO (44%)<br>HOMO→L+1 (32%) | <sup>3</sup> IL/ <sup>β</sup> LLCT/ <sup>β</sup> MC/ <sup>β</sup> LMCT<br><sup>3</sup> IL/ <sup>β</sup> MC/ <sup>β</sup> LMCT |           |
| T3     | 428 (2.90)         | 0.0000 | H-2→LUMO (85%)                   | <sup>3</sup> IL/ <sup>β</sup> MC/ <sup>β</sup> MLCT                                                                           |           |

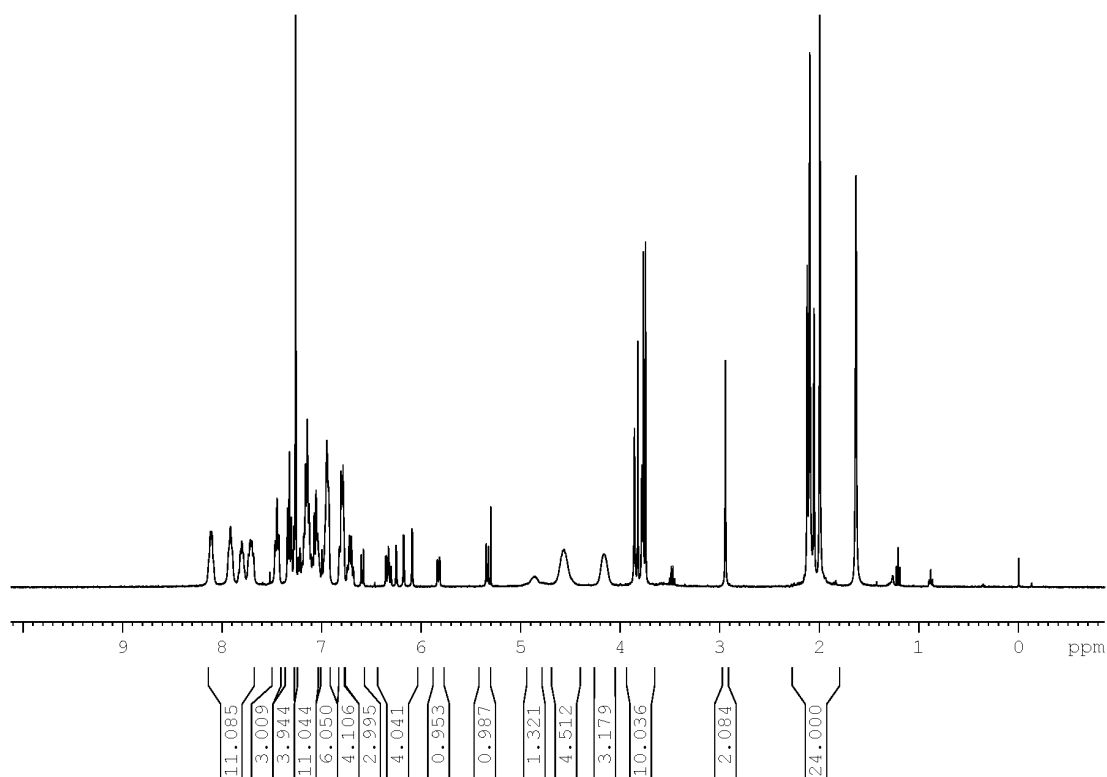

**Fig. S1** The <sup>1</sup>H NMR spectrum of complex **1** in CDCl<sub>3</sub> solution at ambient temperature.



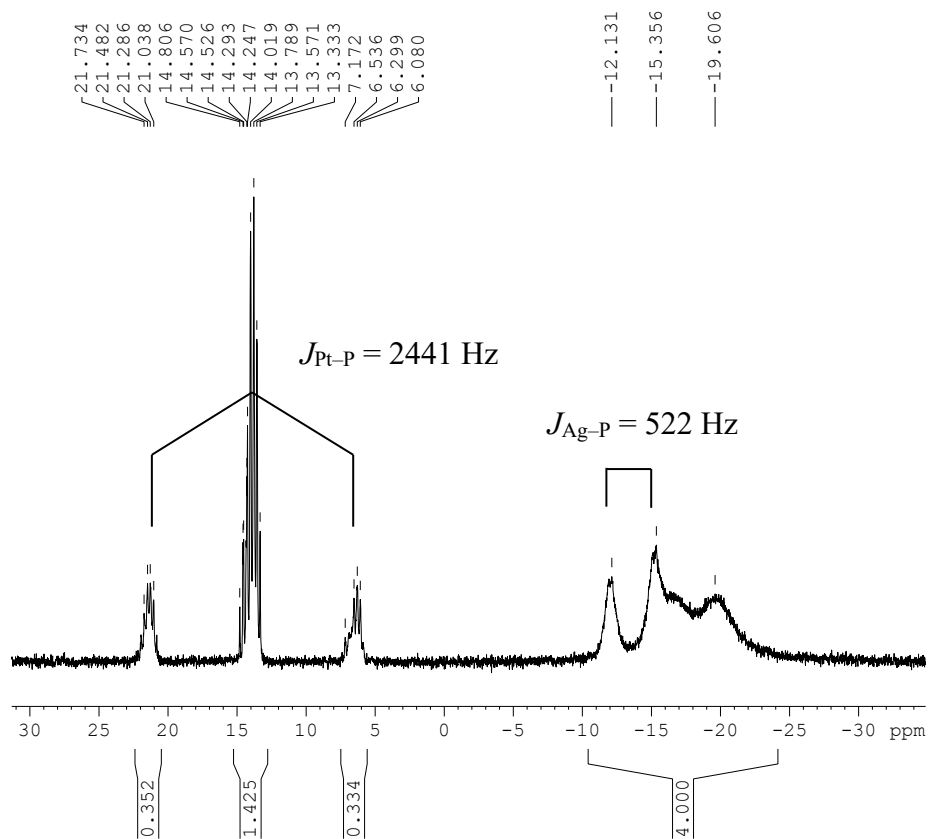

**Fig. S2** The  $^{31}\text{P}$  NMR spectrum of complex **1** in  $\text{CDCl}_3$  solution at ambient temperature.

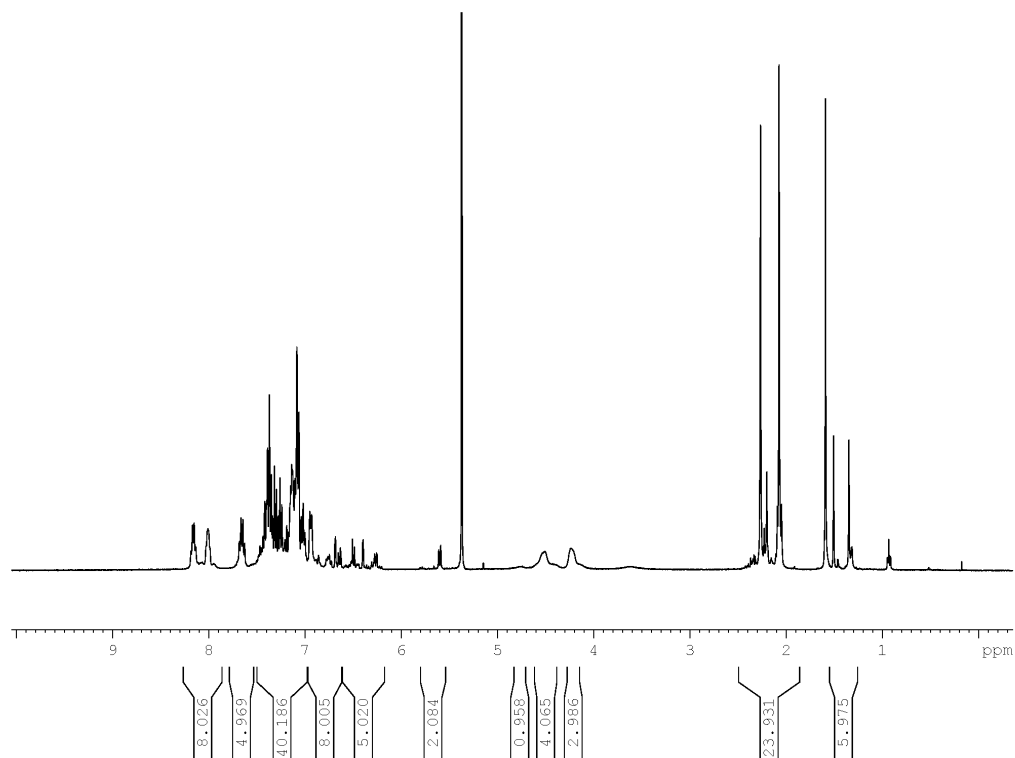

**Fig. S3** The  $^1\text{H}$  NMR spectrum of complex **2** in  $\text{CD}_2\text{Cl}_2$  solution at ambient temperature.

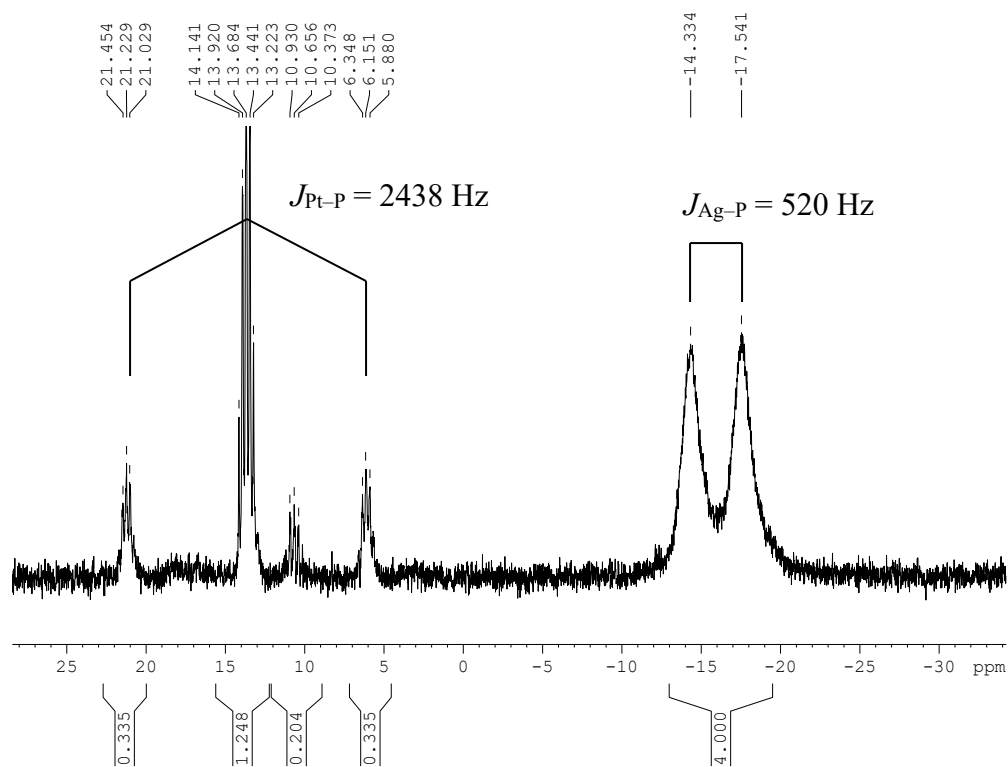

**Fig. S4** The  $^{31}\text{P}$  NMR spectrum of complex **2** in  $\text{CD}_2\text{Cl}_2$  solution at ambient temperature.

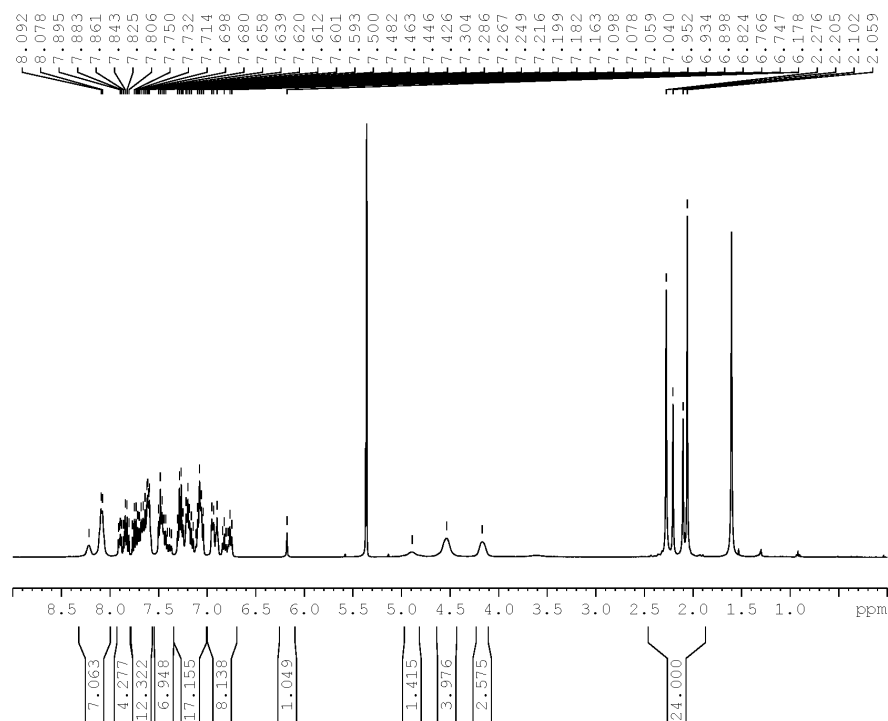

**Fig. S5** The  $^1\text{H}$  NMR spectrum of complex **3** in  $\text{CD}_2\text{Cl}_2$  solution at ambient temperature.

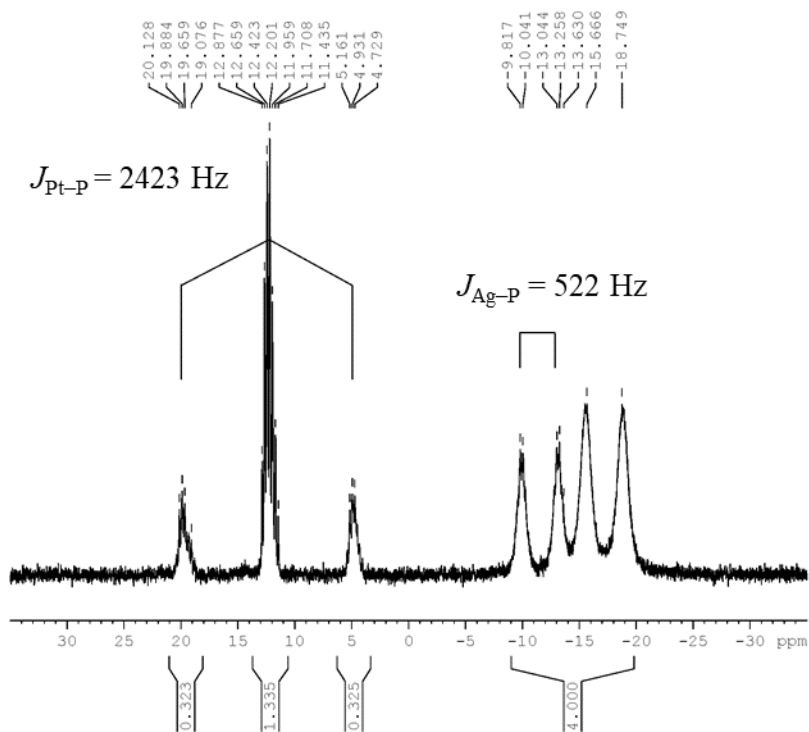

**Fig. S6** The  $^{31}\text{P}$  NMR spectrum of complex **3** in  $\text{CD}_2\text{Cl}_2$  solution at ambient temperature.

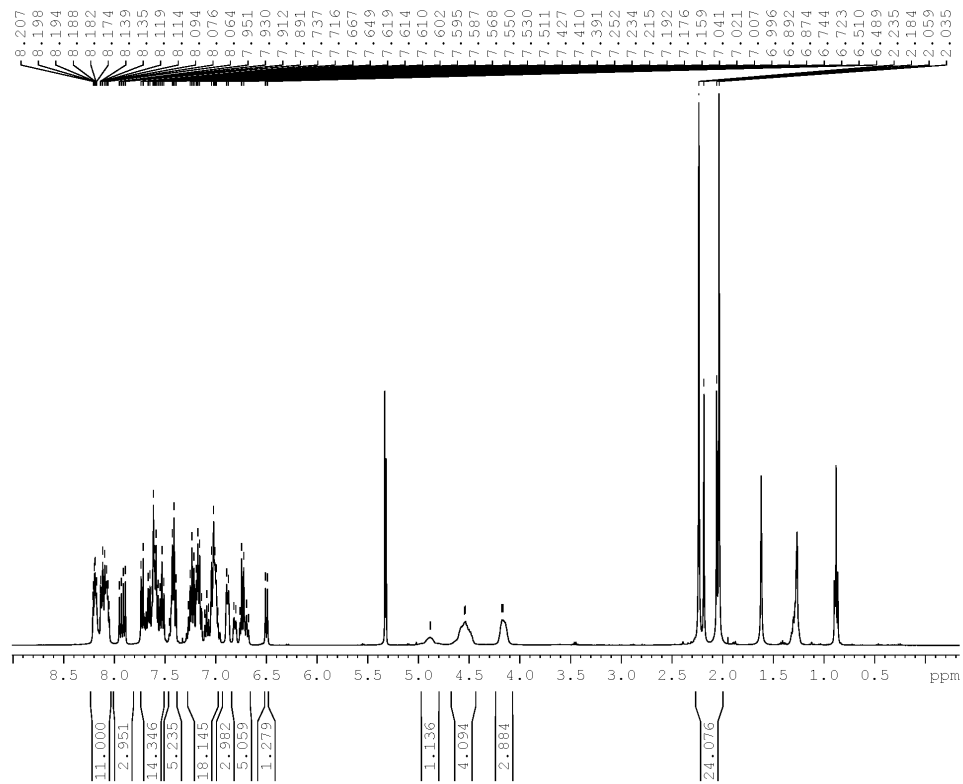

**Fig. S7** The  $^1\text{H}$  NMR spectrum of complex **4** in  $\text{CD}_2\text{Cl}_2$  solution at ambient temperature.

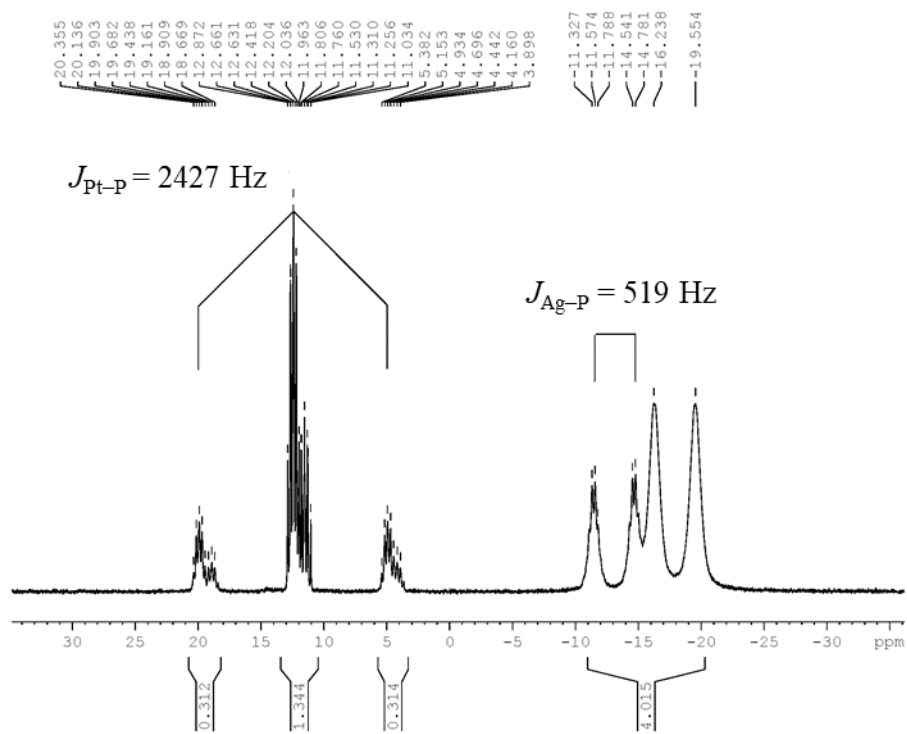

**Fig. S8** The  $^{31}\text{P}$  NMR spectrum of complex **4** in  $\text{CD}_2\text{Cl}_2$  solution at ambient temperature.

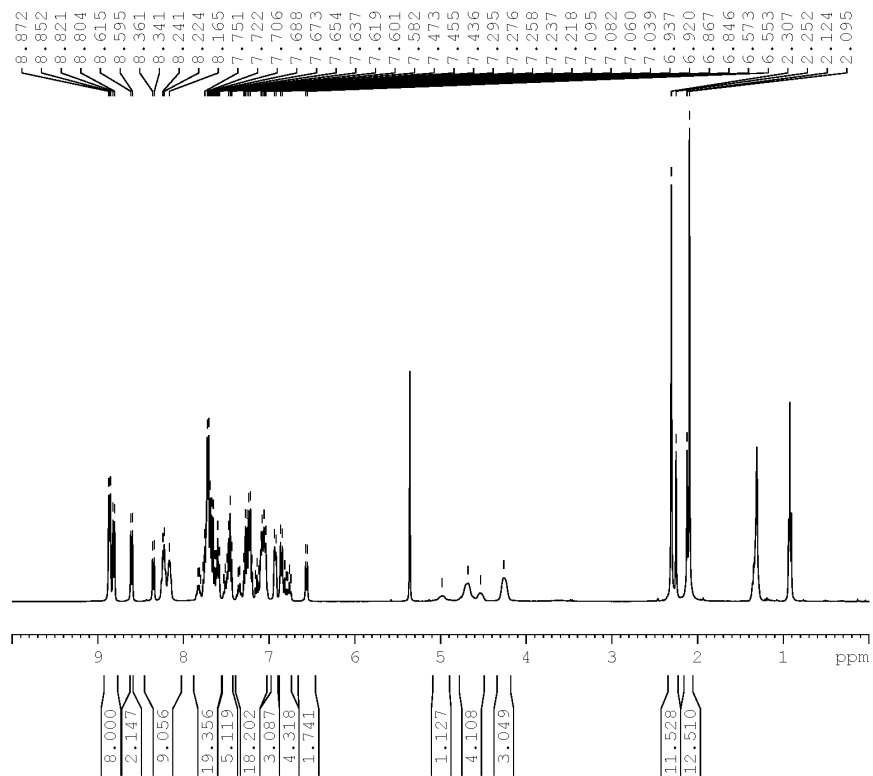

**Fig. S9** The  $^1\text{H}$  NMR spectrum of complex **5** in  $\text{CD}_2\text{Cl}_2$  solution at ambient temperature.

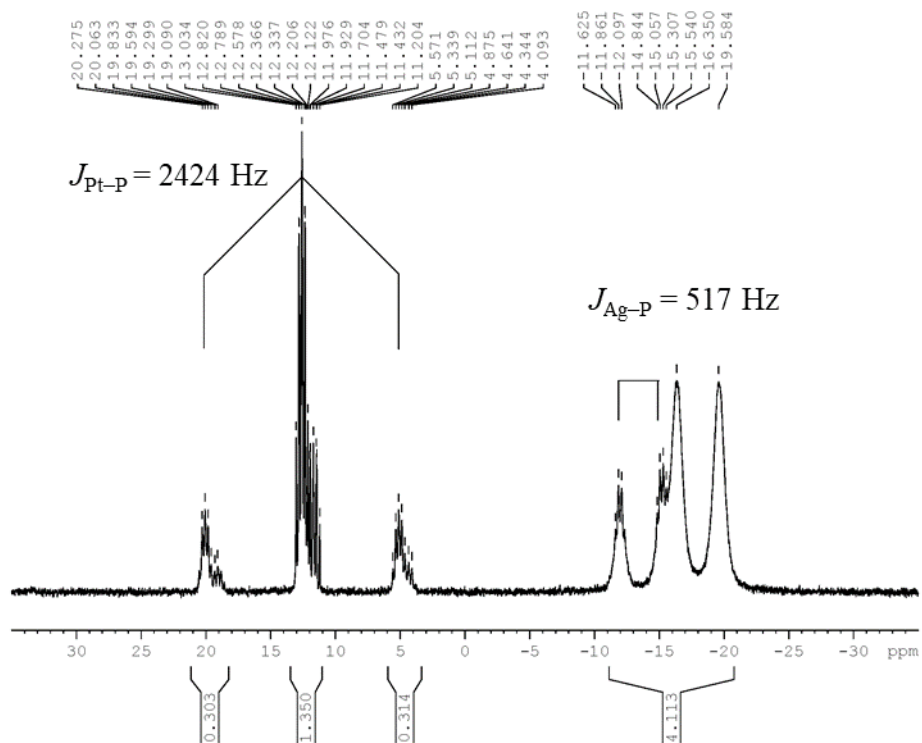

**Fig. S10** The  $^{31}\text{P}$  NMR spectrum of complex **5** in  $\text{CD}_2\text{Cl}_2$  solution at ambient temperature.

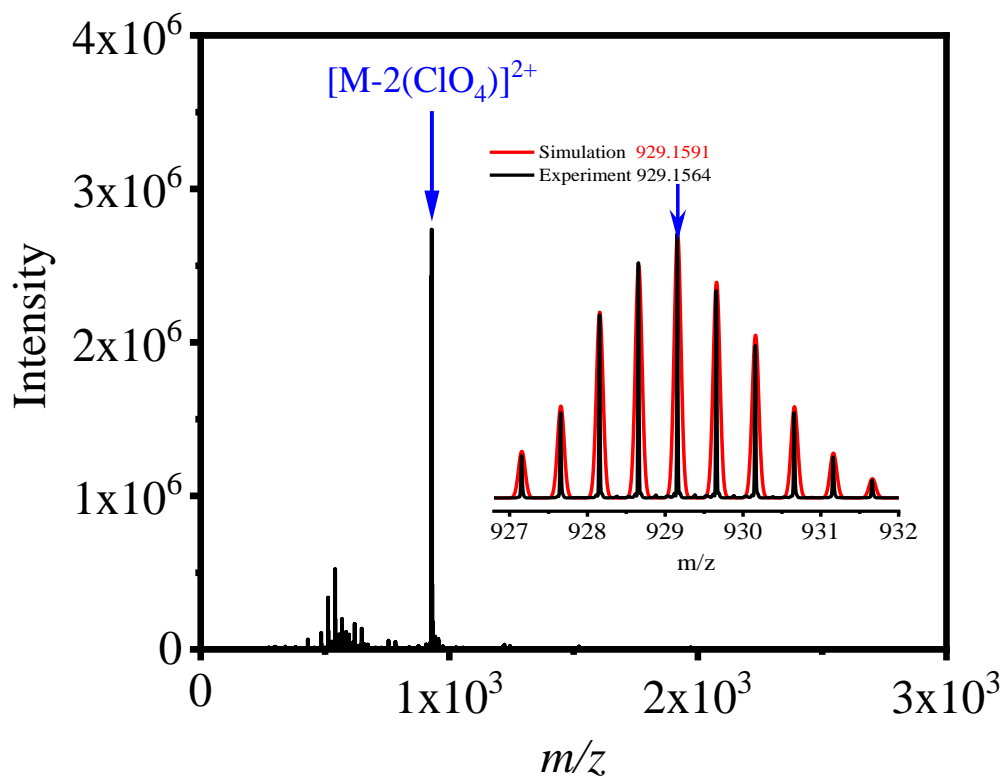

**Fig. S11** The high-resolution mass spectrometry of  $\text{PtAg}_2$  complex **1**. Inset: The measured and simulated isotopic patterns.

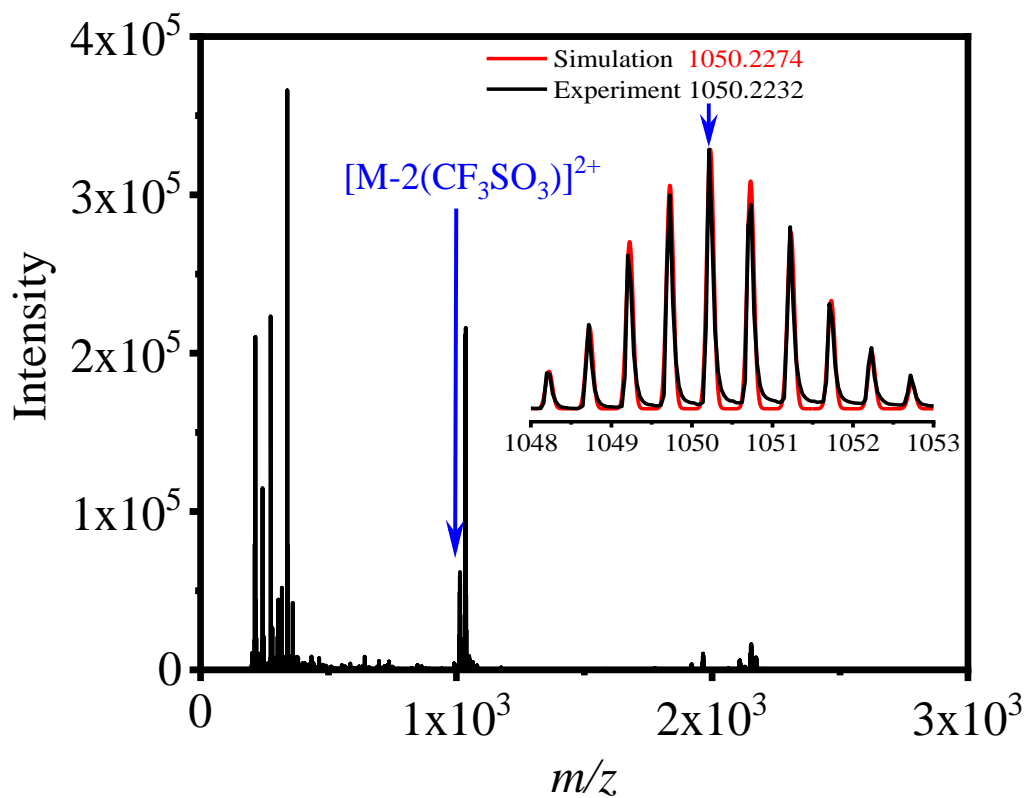

**Fig. S12** The high-resolution mass spectrometry of PtAg<sub>2</sub> complex **2**. Inset: The measured and simulated isotopic patterns.

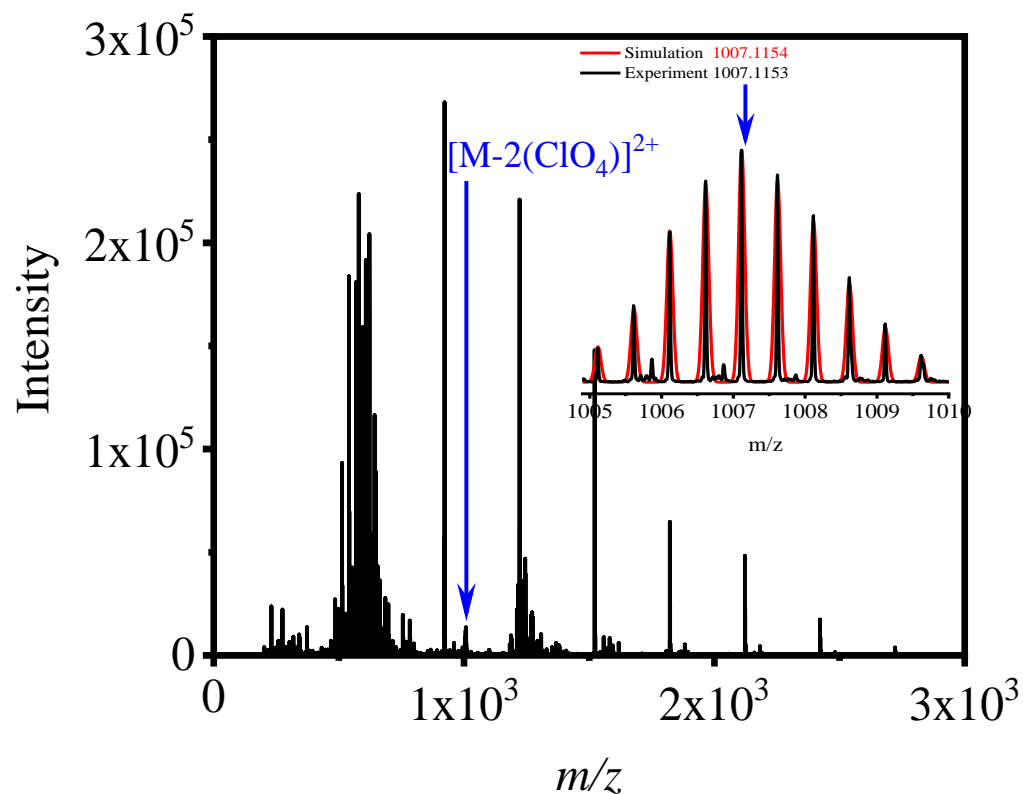

**Fig. S13** The high-resolution mass spectrometry of PtAg<sub>2</sub> complex **3**. Inset: The measured and simulated isotopic patterns.

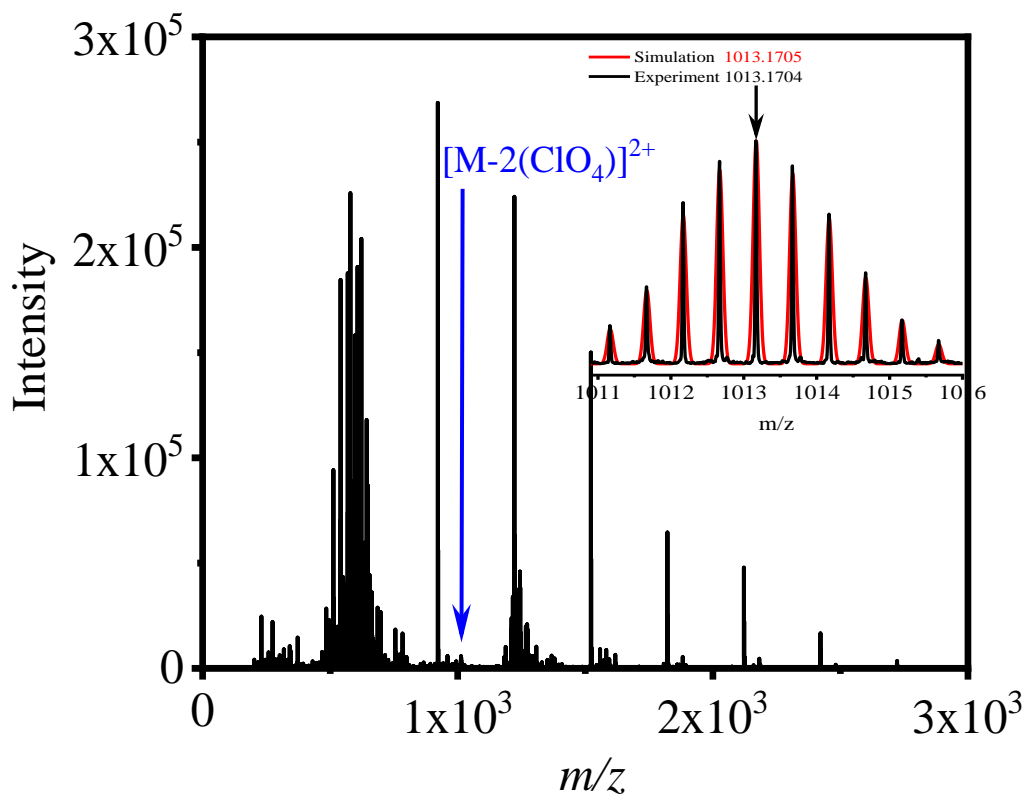

**Fig. S14** The high-resolution mass spectrometry of PtAg<sub>2</sub> complex **4**. Inset: The measured and simulated isotopic patterns.

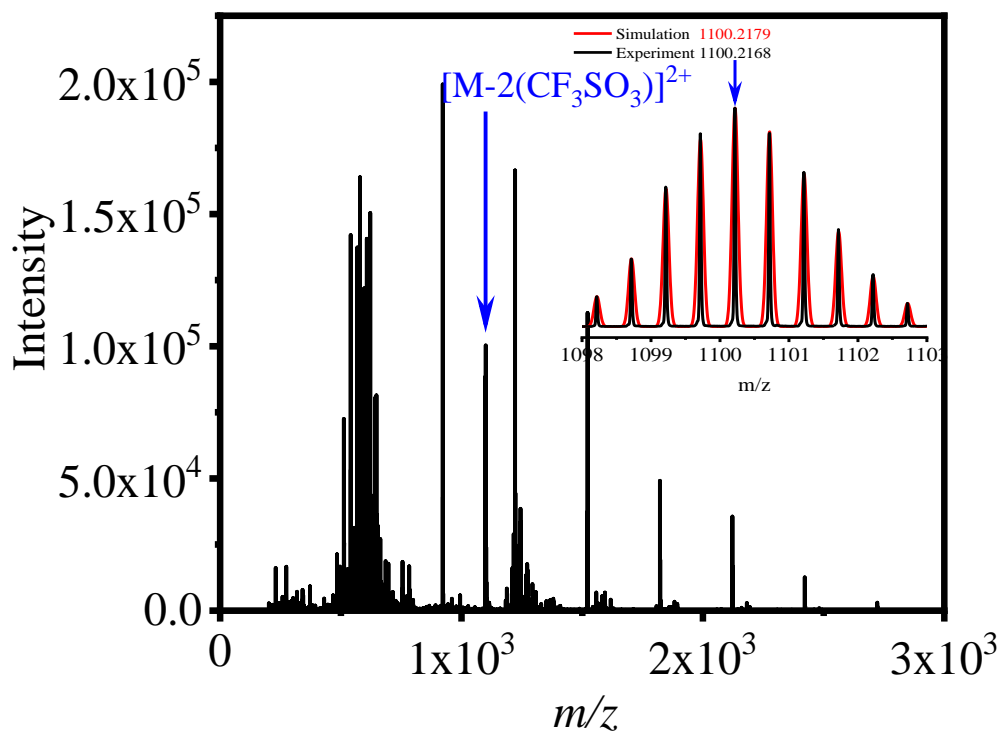

**Fig. S15** The high-resolution mass spectrometry of PtAg<sub>2</sub> complex **5**. Inset: The measured and simulated isotopic patterns.

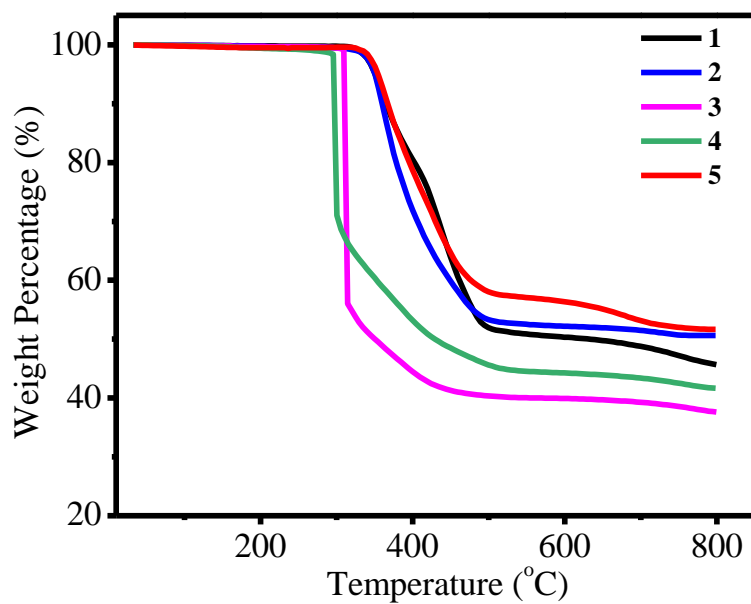

**Fig. S16** Thermogravimetric analysis for complexes 1-5.

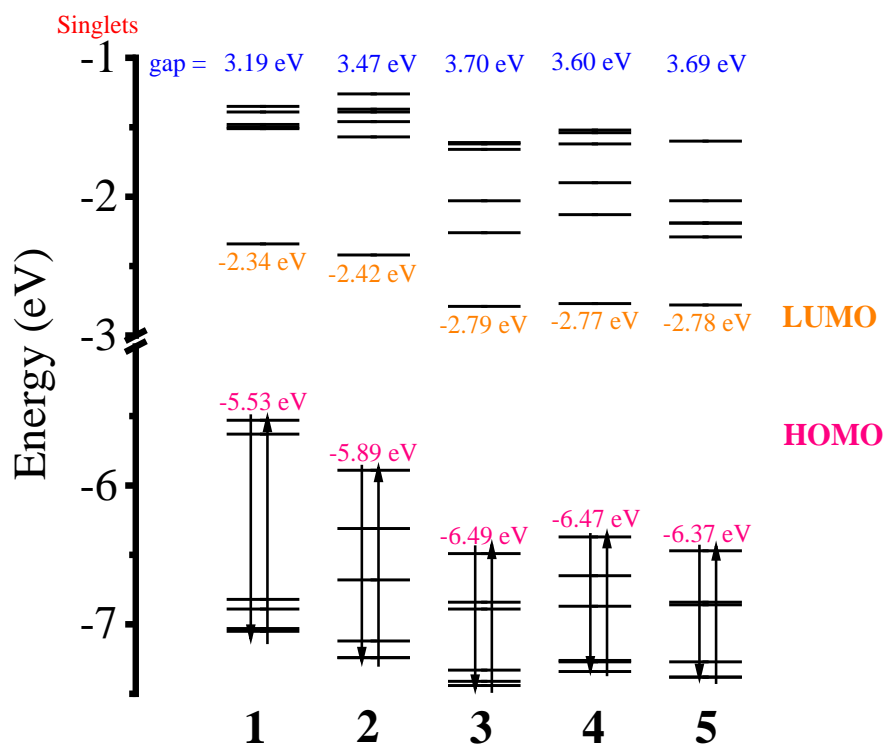

**Fig. S17** Plots of energy level of frontier orbitals in the ground states for complexes 1-5, respectively, in the CH<sub>2</sub>Cl<sub>2</sub> solution by TD-DFT method at the PBE1PBE level.



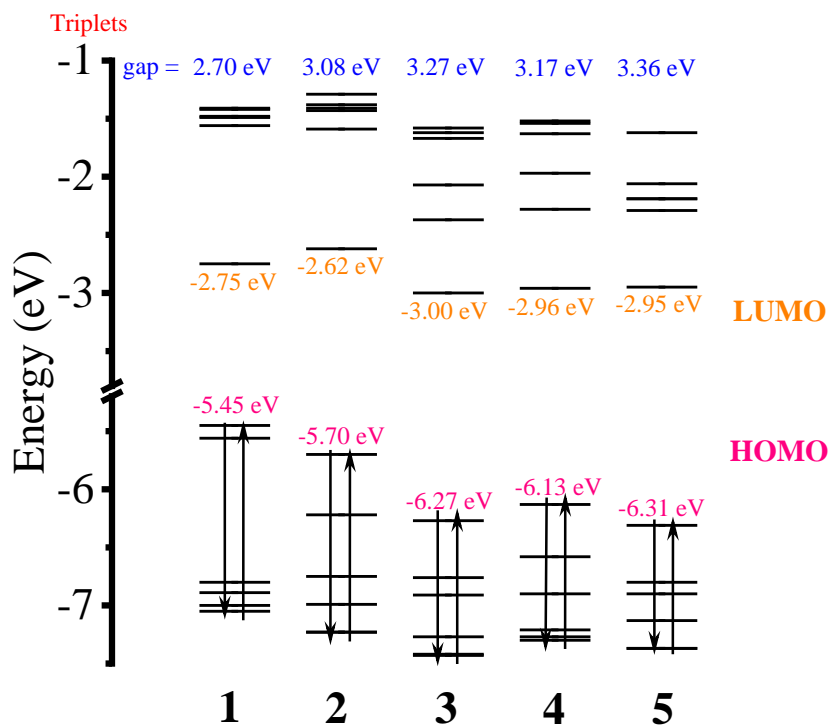

**Fig. S18** Plots of energy level of frontier orbitals in the lowest-energy triplet states for complexes **1-5**, respectively, in the  $\text{CH}_2\text{Cl}_2$  solution by TD-DFT method at the PBE1PBE level.

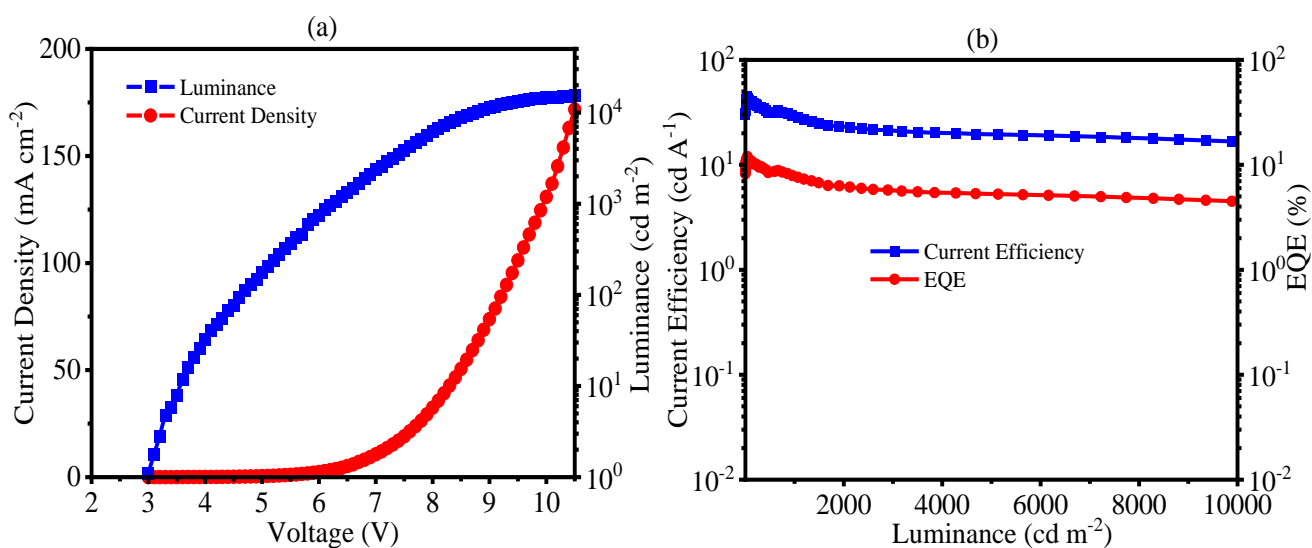

**Fig. S19** (a) Current density-voltage-luminance characteristics. (b) Current efficiency/external quantum efficiency vs luminance for OLED based on complex **1**.

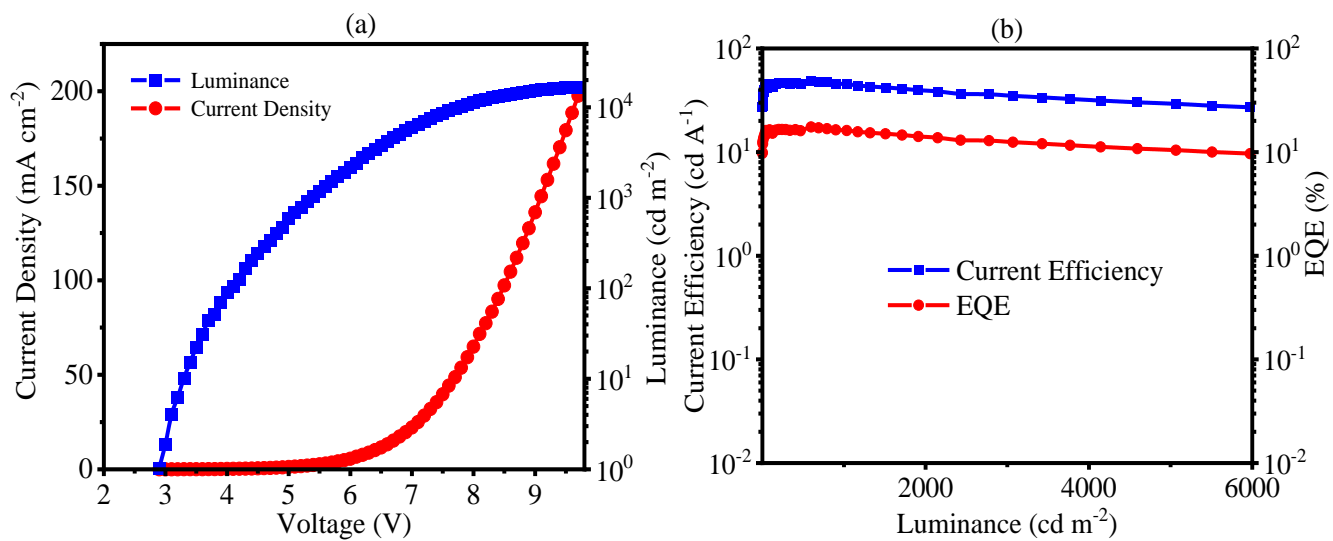

**Fig. S20** (a) Current density-voltage-luminance characteristics. (b) Current efficiency/external quantum efficiency vs luminance for OLED based on complex 2.

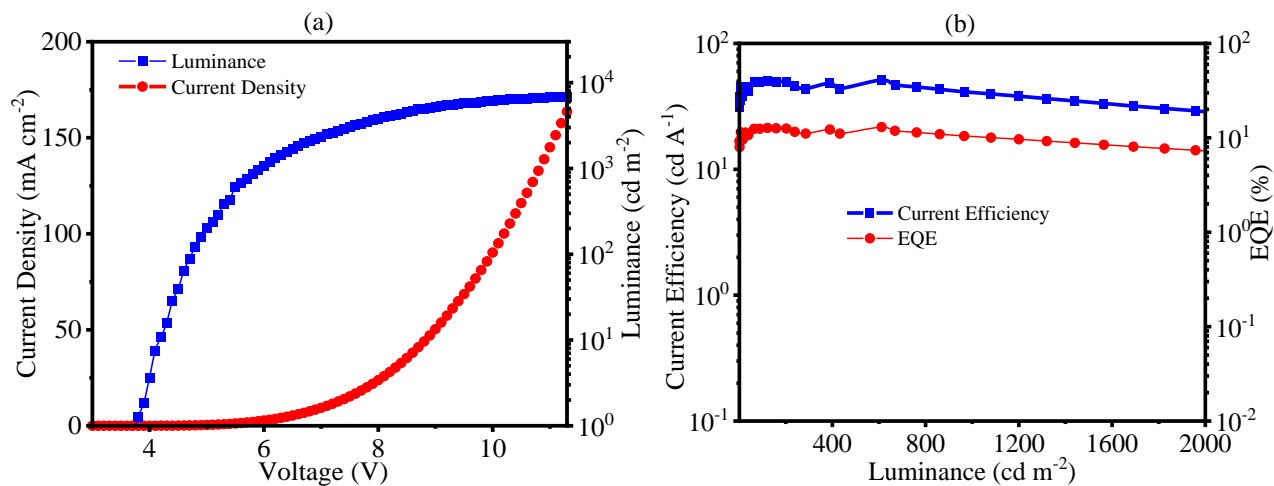

**Fig. S21** (a) Current density-voltage-luminance characteristics. (b) Current efficiency/external quantum efficiency vs luminance for OLED based on complex **3**.

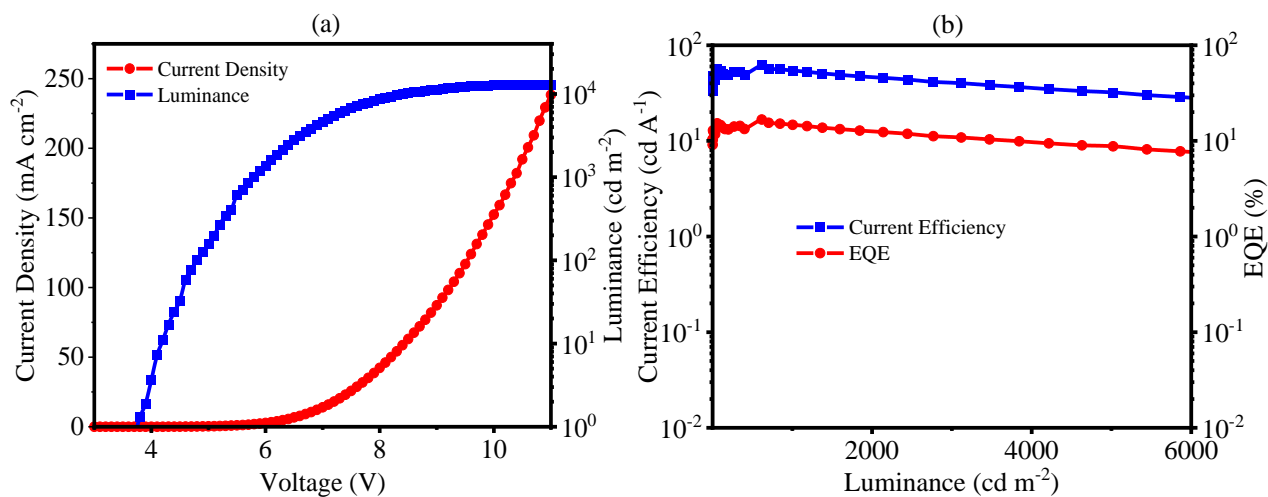

**Fig. S22** (a) Current density-voltage-luminance characteristics. (b) Current efficiency/external quantum efficiency vs luminance for OLED based on complex **5**.
